# Supplementary material for: Role of Matrix Metalloproteinases 7 in the Pathogenesis of Laryngopharyngeal Reflux: Decreased E-cadherin in Acid exposed Primary Human Pharyngeal Epithelial Cells
Source: PubMed Central journal article supplement (PMC6862869; doi:10.3390/ijms20215276), 2019-10-24
Supplement: ijms-20-05276-s001.pdf [file ijms-20-05276-s001.pdf]

## Supplementary Materials

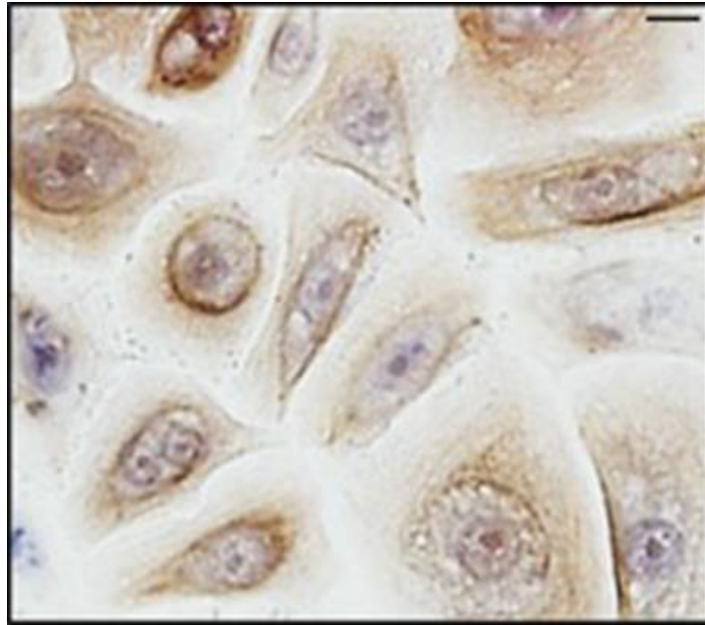

**Supplementary Figure S1.** Cytokeratin immunocytochemical stain of primary pharyngeal epithelial cells. Most of the pharyngeal epithelial cells show cytokeratin expression (bar, 50  $\mu$ m).

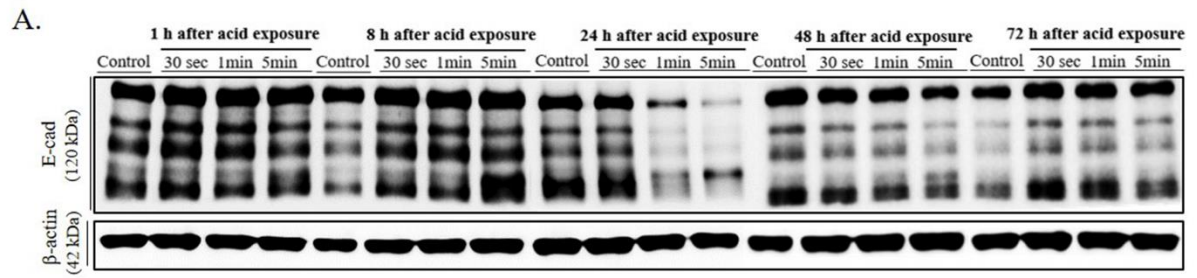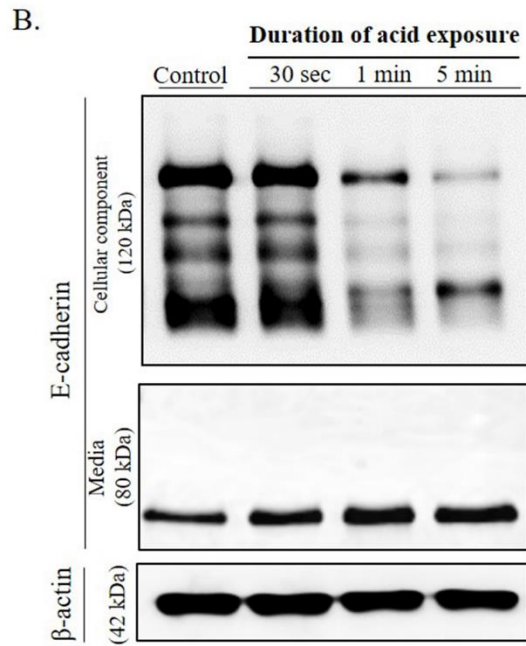

**Supplementary Figure S2.** E-cadherin cleavage in human pharyngeal mucosal epithelial cells exposed to acidic media (Full-length blots/gels of Figure 1).

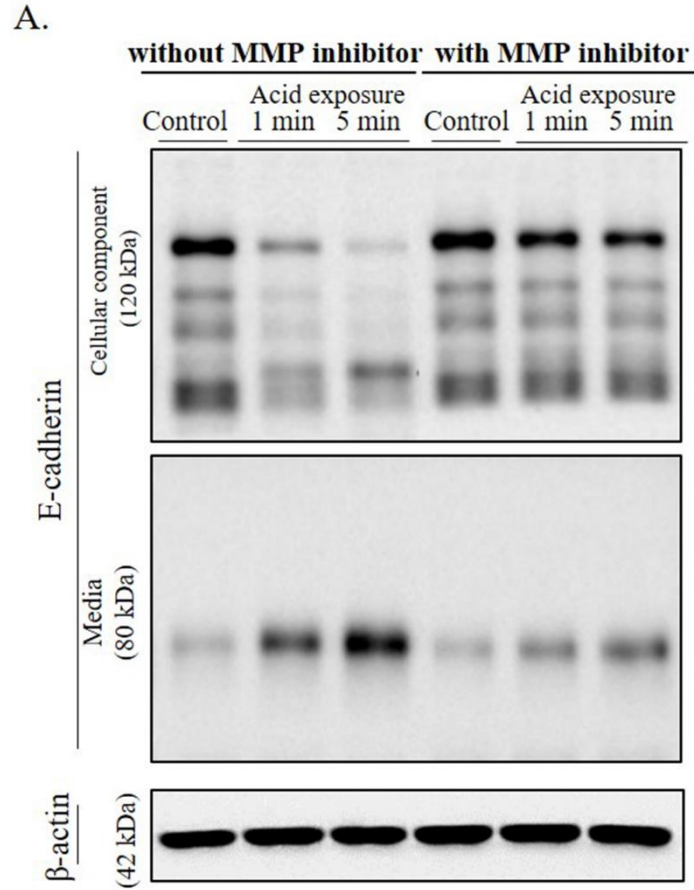

**Supplementary Figure S3.** Effect of MMP inhibitor on changes in E-cadherin (Full-length blots/gels of Figure 2).

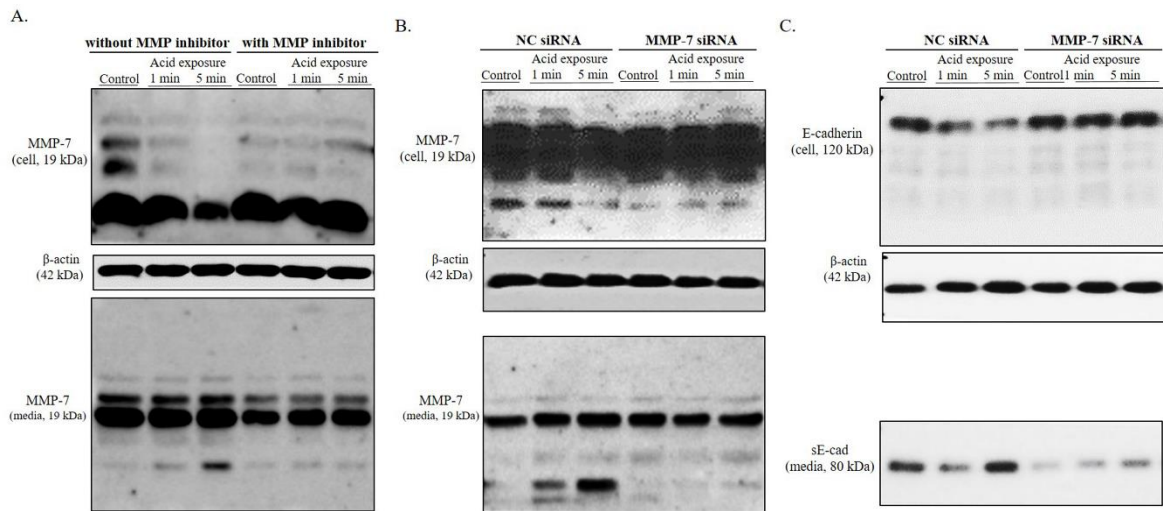

**Supplementary Figure S4.** Effect of MMP inhibitor and MMP-7 knockdown on changes in MMP-7 (Full-length blots/gels of Figure 4).
